# Supplementary material
Source: publisher figshare collection journal article supplement (https://acs.figshare.com/ndownloader/files/3960280)
Supplement: Supplementary file 1 [file 3960280]

Measurement and prediction of excess enthalpies for ternary solutions  
1-Ethyl-3-methylimidazolium dimethylphosphate + Methanol or ethanol  
+Water at 298.15K and at normal atmospheric pressure

*Xiaodong ZHANG, Dapeng HU, Zongchang ZHAO*

Faculty of Chemical Engineering, Environmental and Biological Science and Technology,

Dalian university of technology, 2 Linggong Road, Dalian 116024, China

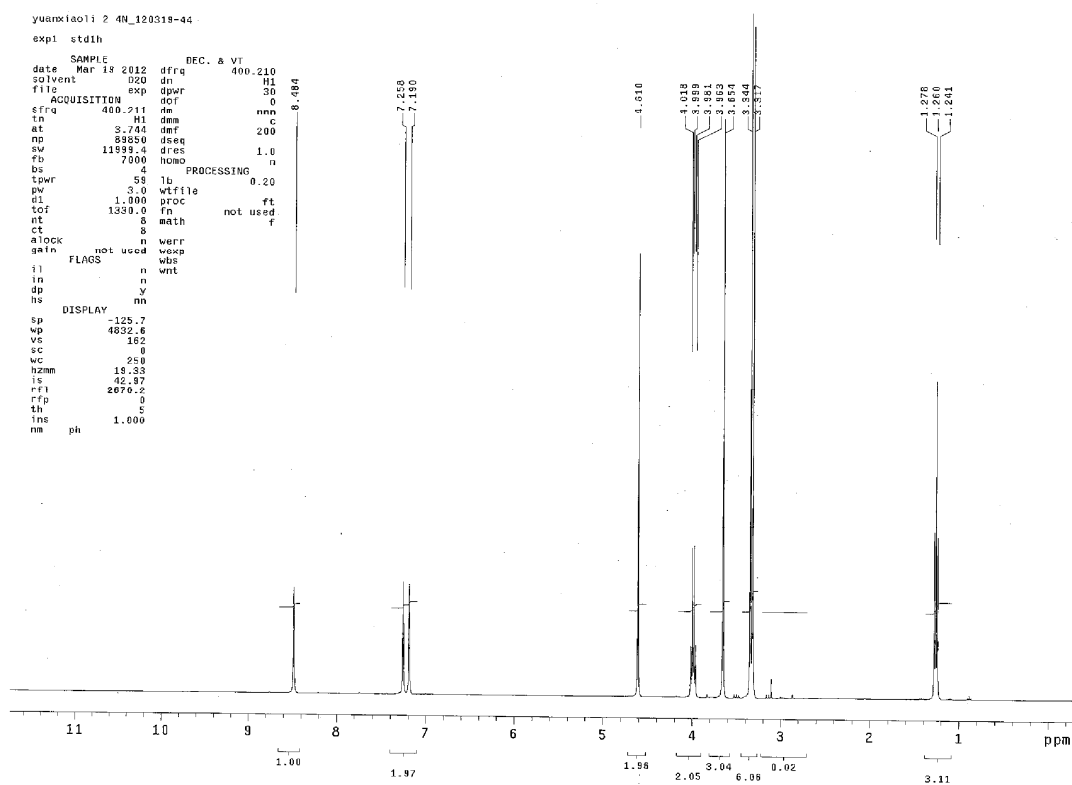

$^1\text{H}$ NMR spectra for [Emim][DMP]
